# Supplementary material
Source: publisher figshare collection journal article supplement (https://gsajournals.figshare.com/ndownloader/files/13993127)
Supplement: Supplementary file 1 [file 13993127]

**Fig. S1**

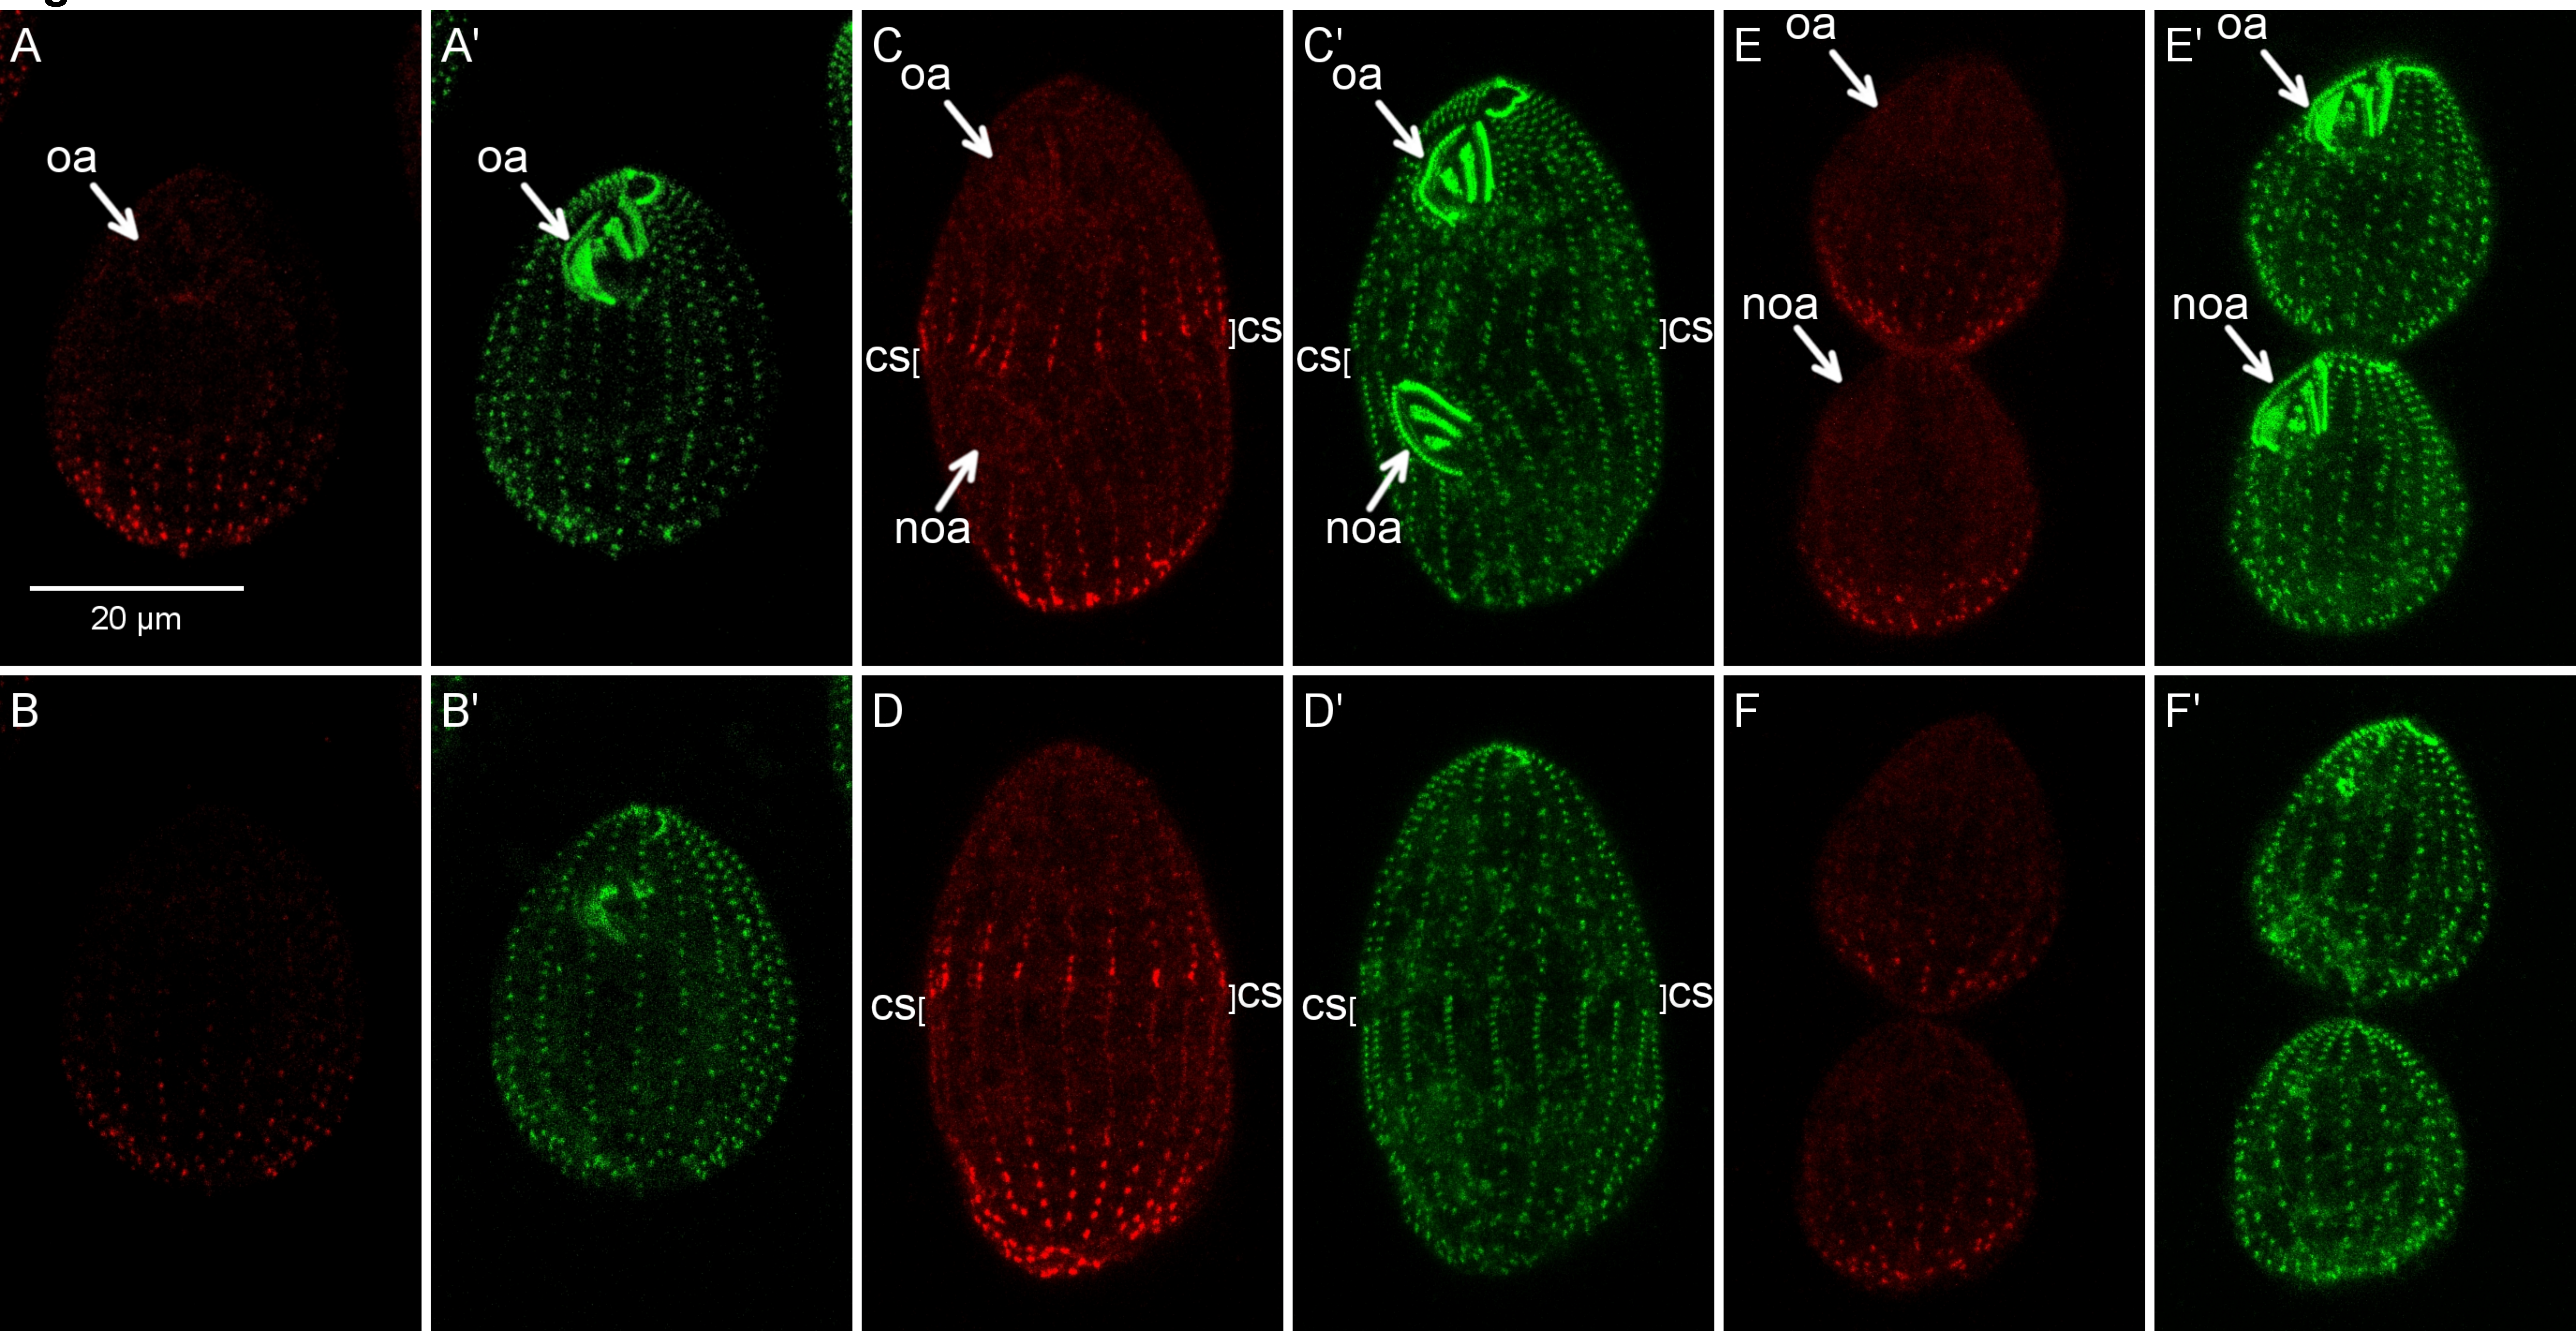



**Figure S1.** A detailed presentation of the images shown in Fig. 4. The cells expressing Elo1-GFP were labeled with antibodies against GFP (red) and centrin (green). Pairs of panels represent the same cell imaged in two color channels. (A-B') A cell in interphase viewed from either ventral (A-A') or dorsal (B-B') side. (C-D') A cell during cortical subdivision viewed from either ventral (C-C') or dorsal (D-D') side. (E-F') A cell in cytokinesis shown from the ventral (E-E') or dorsal (F-F') side.



**Fig. S2**

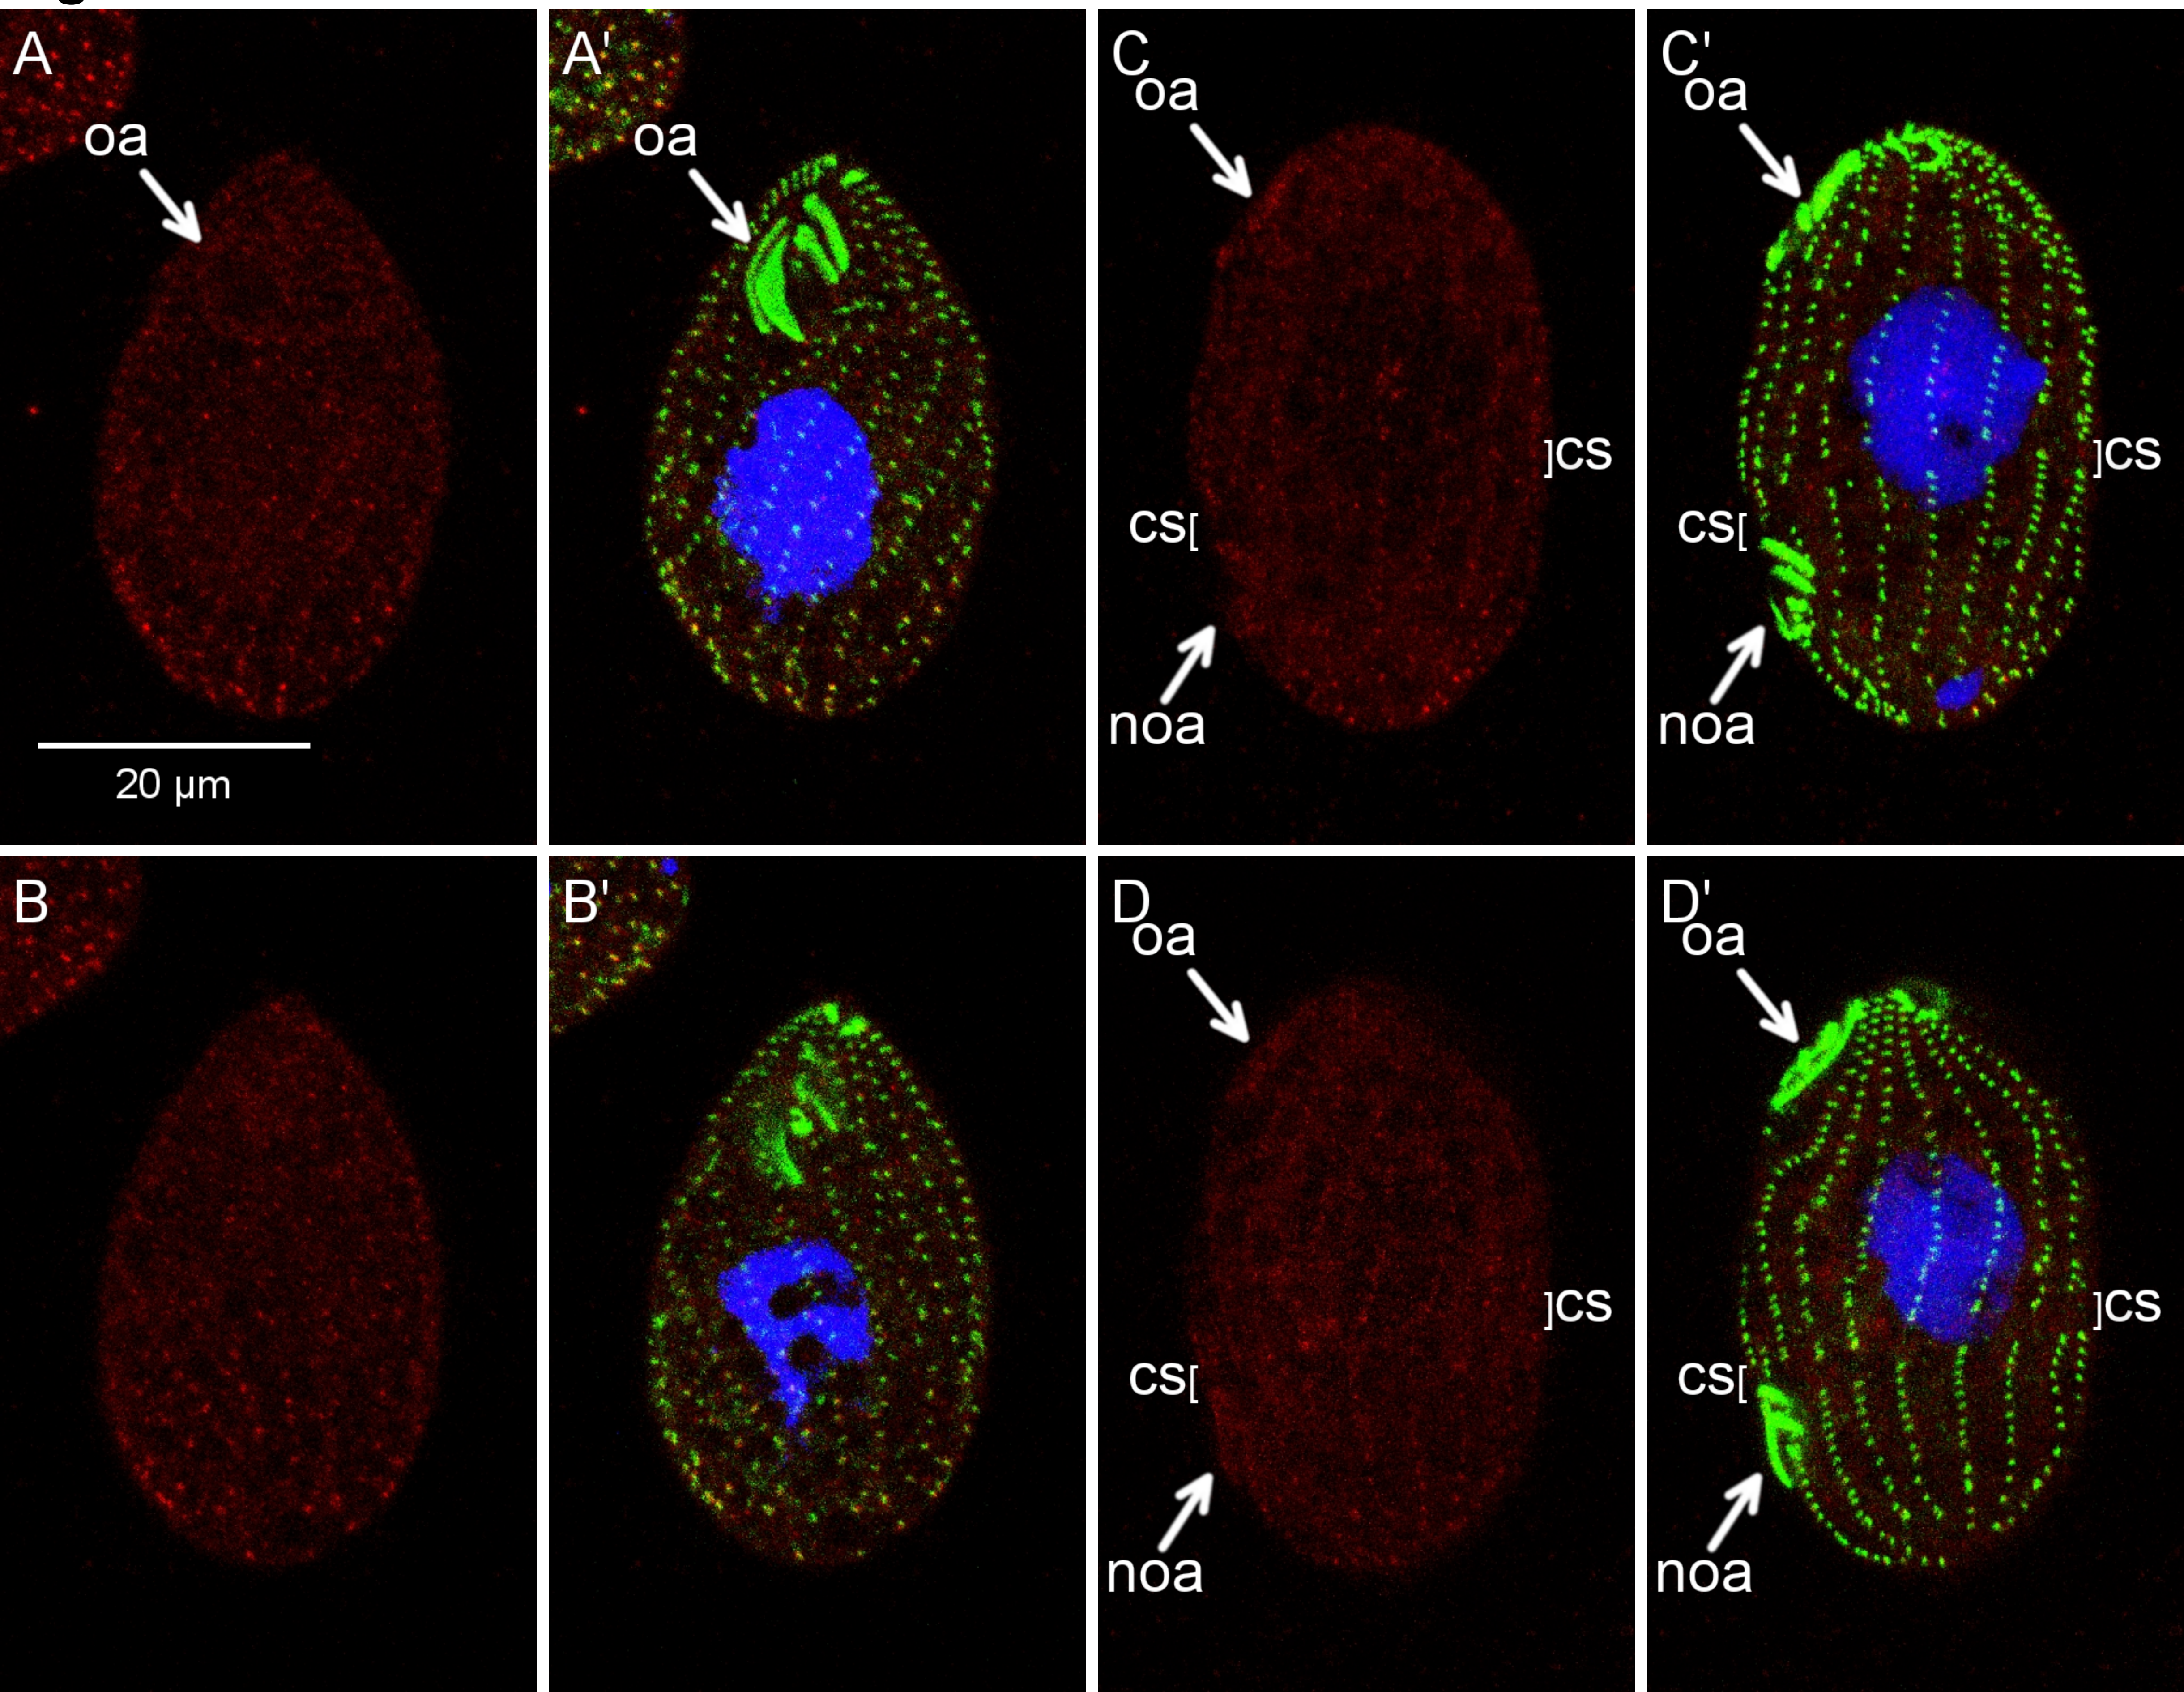



**Figure S2.** Images of *elo1-1* cells that express mutant Elo1 protein Elo1(G249V)-GFP. These cells were obtained using the same approach as cells expressing the wild-type Elo1-GFP protein (Figs. 4 and S1) Importantly, these cells were subject to phenotypic assortment in parallel with the cells expressing the wild-type GFP tagged protein and therefore the transgene copy number is expected to be similar in the two genetic backgrounds. Pairs of images show the Elo1(G249V)-GFP (red) and centrin (green) signals. We quantified the Elo1-GFP and Elo1-(G249V)-GFP pixel intensity in the area close to the posterior cell end (within a zone of 5 most posterior basal bodies). The average pixel intensity of Elo1-(G249V)-GFP was  $0.25 \pm 0.23$  (n=44 basal bodies; n=2 cells) as compared to  $1.12 \pm 0.57$  for Elo1-GFP (n=50 basal bodies; n=2 cells).
